# Supplementary material for: Block selective grafting of poly(vinylphosphonic acid) from aromatic multiblock copolymers for nanostructured electrolyte membranes
Source: Royal Society of Chemistry journal article supplement (doi:10.1039/c3py00513e), 2013-01-01
Supplement: c3py00513e.pdf [file c3py00513e.pdf]

## Supplementary Information

### Block selective grafting of poly(vinylphosphonic acid) from aromatic multiblock copolymers for nanostructured proton conducting membranes

Arindam Sannigrahi, Shogo Takamuku and Patric Jannasch\*

*Department of Chemistry, Polymer & Materials Chemistry,  
Lund University, P.O.B. 124, SE-221 00 Lund, Sweden*

\*E-mail patric.jannasch@chem.lu.se.

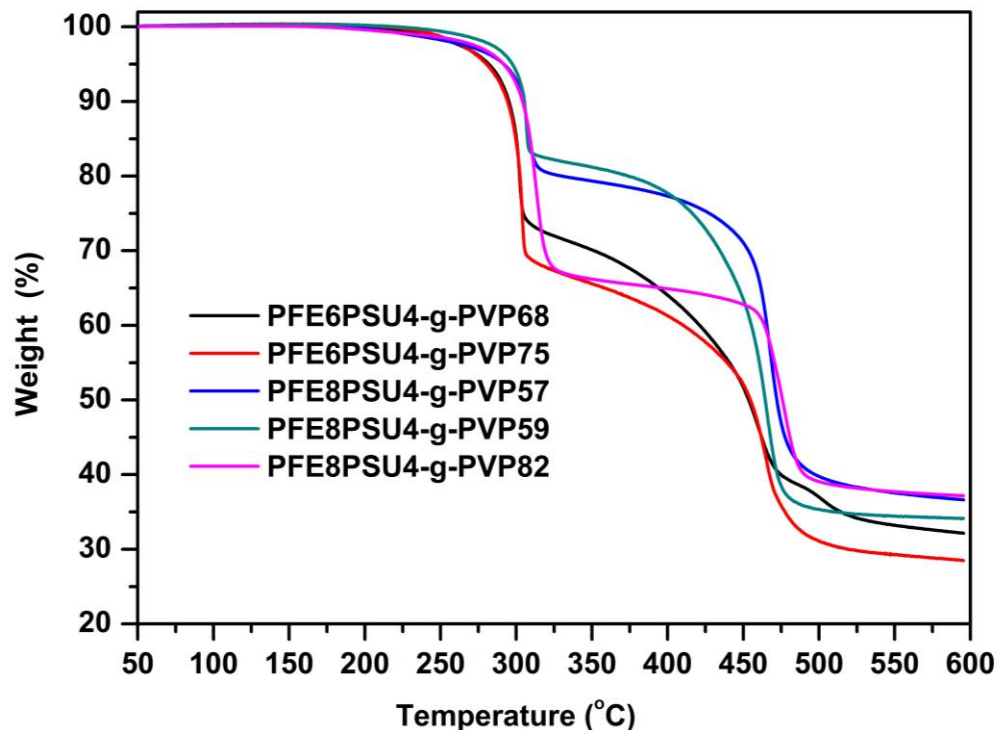

**Fig. S1** TGA traces of the PFE<sub>x</sub>PSU<sub>4</sub>-g-PVPA<sub>y</sub> samples in the ester form, recorded at 10 °C min<sup>-1</sup> under N<sub>2</sub>.
